# Supplementary material for: CuO/V2O5 hybrid nanowires for highly sensitive and selective H2S gas sensor
Source: Royal Society of Chemistry journal article supplement (doi:10.1039/c7ra06657k), 2017-01-01
Supplement: c7ra06657k1.pdf [file c7ra06657k1.pdf]

Supplementary Material (ESI) for RSC Advances

This journal is (c) The Royal Society of Chemistry 2017

Supporting information for

### **CuO/V<sub>2</sub>O<sub>5</sub> hybrid nanowires for highly sensitive and selective H<sub>2</sub>S gas sensor**

Bu-Yu Yeh,<sup>1</sup> Bo-Sung Jian,<sup>1</sup> Gou-Jen Wang,<sup>2</sup> and Wenjea J. Tseng<sup>1,\*</sup>

<sup>1</sup>Department of Materials Science and Engineering, National Chung Hsing University,  
Taiwan

<sup>2</sup>Department of Mechanical Engineering, National Chung Hsing University, Taiwan

A typical TEM bright-field image of the CuO-decorated V<sub>2</sub>O<sub>5</sub> nanorod has been shown on the left-hand-side of Fig. S1. An interface region on the right-hand-side of Fig. S1 shows clearly that the CuO nanoisland adheres on the V<sub>2</sub>O<sub>5</sub> nanorod together with lattice fringes on both of the CuO and V<sub>2</sub>O<sub>5</sub> phases. The lattice-fringe spacings of the CuO nanoisland have been determined; in which, 0.268 and 0.245 nm correspond to the (110) and (11-1) planes of the monoclinic CuO structure, respectively.

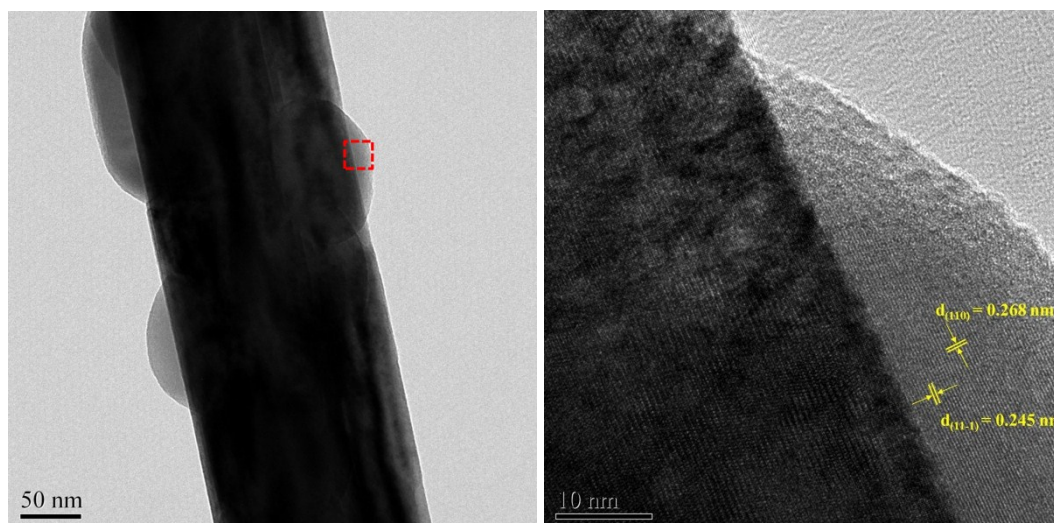

Figure S1. High-resolution bright-field TEM image of the CuO/V<sub>2</sub>O<sub>5</sub> hybrid nanowires.
